# Supplementary material for: Tuning the Au–Au interactions by varying the degree of polymerisation in linear polymeric Au(i) N-heterocyclic carbene complexes
Source: Royal Society of Chemistry journal article supplement (doi:10.1039/d2tc00534d), 2022-01-01
Supplement: d2tc00534d1.pdf [file d2tc00534d1.pdf]

Electronic Supplementary Information for:

## Tuning the Au–Au interactions by varying the degree of polymerisation in linear polymeric Au(I) *N*-heterocyclic carbene complexes

Arruri Sathyanarayana<sup>a,b†</sup>, Kumar Siddhant<sup>a†</sup>, Masaya Yamane<sup>a</sup>, Kyohei Hisano<sup>a</sup>, Ganesan Prabusankar<sup>c</sup> and Osamu Tsutsumi<sup>\*a</sup>

<sup>a</sup> *Department of Applied Chemistry, College of Life Sciences, Ritsumeikan University, 1-1-1 Nojihigashi, Kusatsu 525-8577, Japan.*

\*Correspondence should be addressed to O. Tsutsumi. (email: tsutsumi@sk.ritsumei.ac.jp)

### Table of contents

|                                                                      |               |
|----------------------------------------------------------------------|---------------|
| 1. <b>TG-DTA</b>                                                     | S1            |
| 2. <b>DSC</b>                                                        | S2            |
| 3. <b><sup>1</sup>H NMR</b>                                          | S3-S14        |
| 4. <b>Solution state emission study (before and after degassing)</b> | S15-S17       |
| 5. <b>X-ray crystallography</b>                                      | Table S1, S18 |
| 6. <b>Phase Transition Temperature and POM</b>                       | Table S2, S19 |
| 7. <b>Solution state emission study</b>                              | S20           |
| 8. <b>Structure of complex Me<sub>2</sub>BIAu(I)Cl</b>               | S21           |
| 9. <b>Lifetime decay curve</b>                                       | S22-S24       |
| 10. <b>PXRD analysis</b>                                             | S25           |
| 11. <b>CIE plot</b>                                                  | S26           |
| 12. <b>References</b>                                                |               |

## 1. TG/DTA Analysis

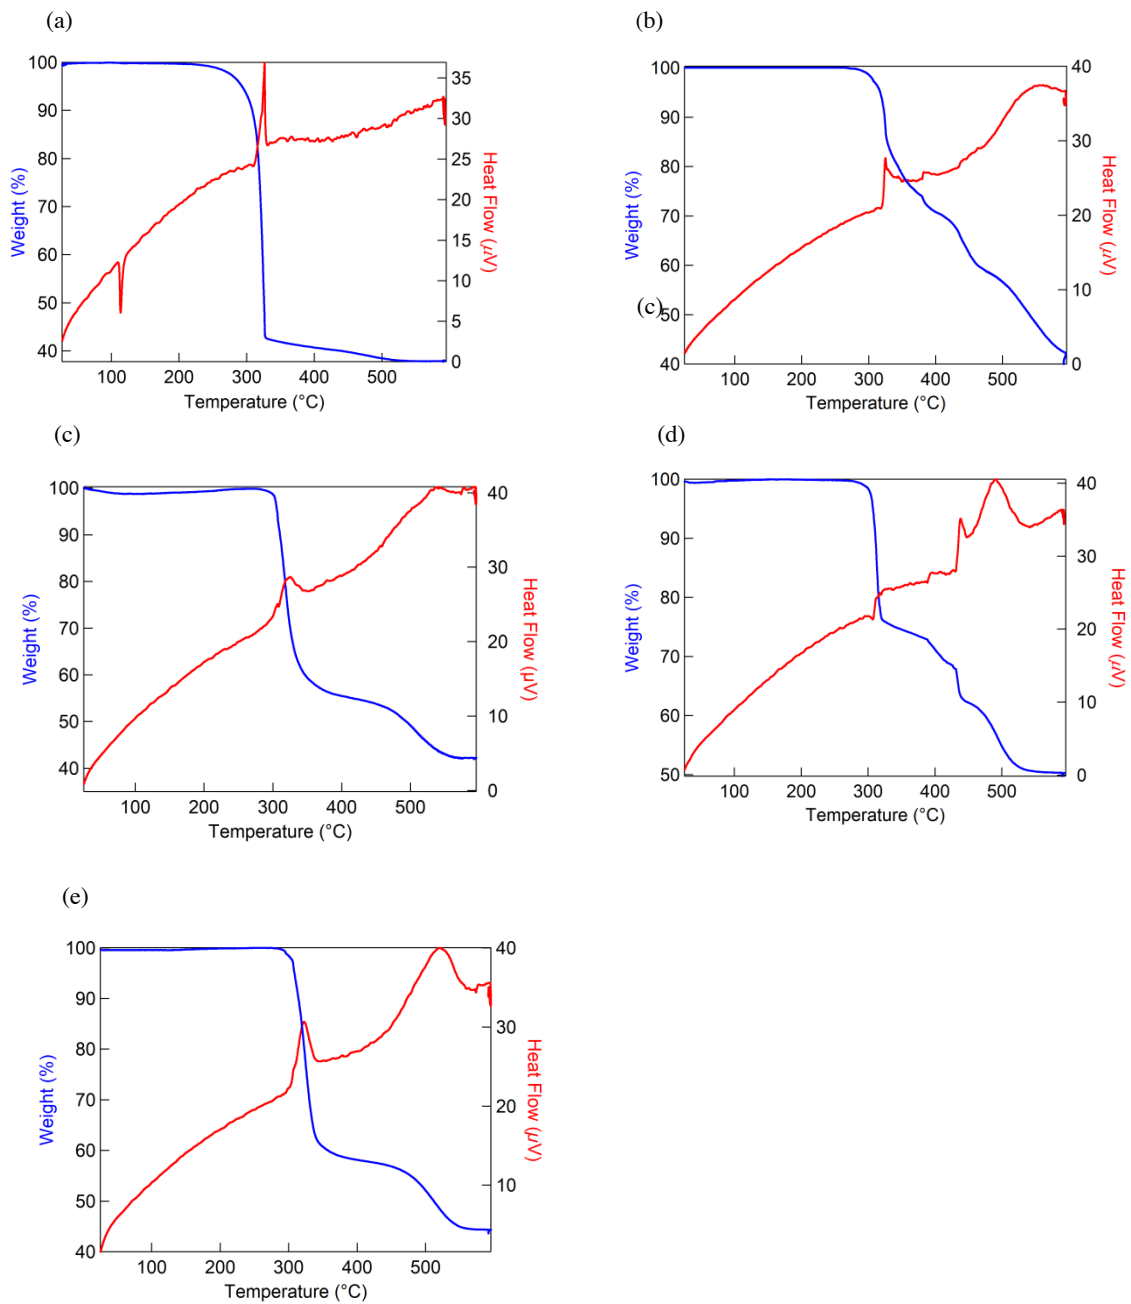

**Figure S1.** TG/DTA analysis of complexes a) **3**; b) **6a-4**; c) **6a-14**; d) **6b-4**; e) **6b-10** in air (Heating rate, 5.0 °C min<sup>-1</sup>).

## 2. DSC analysis

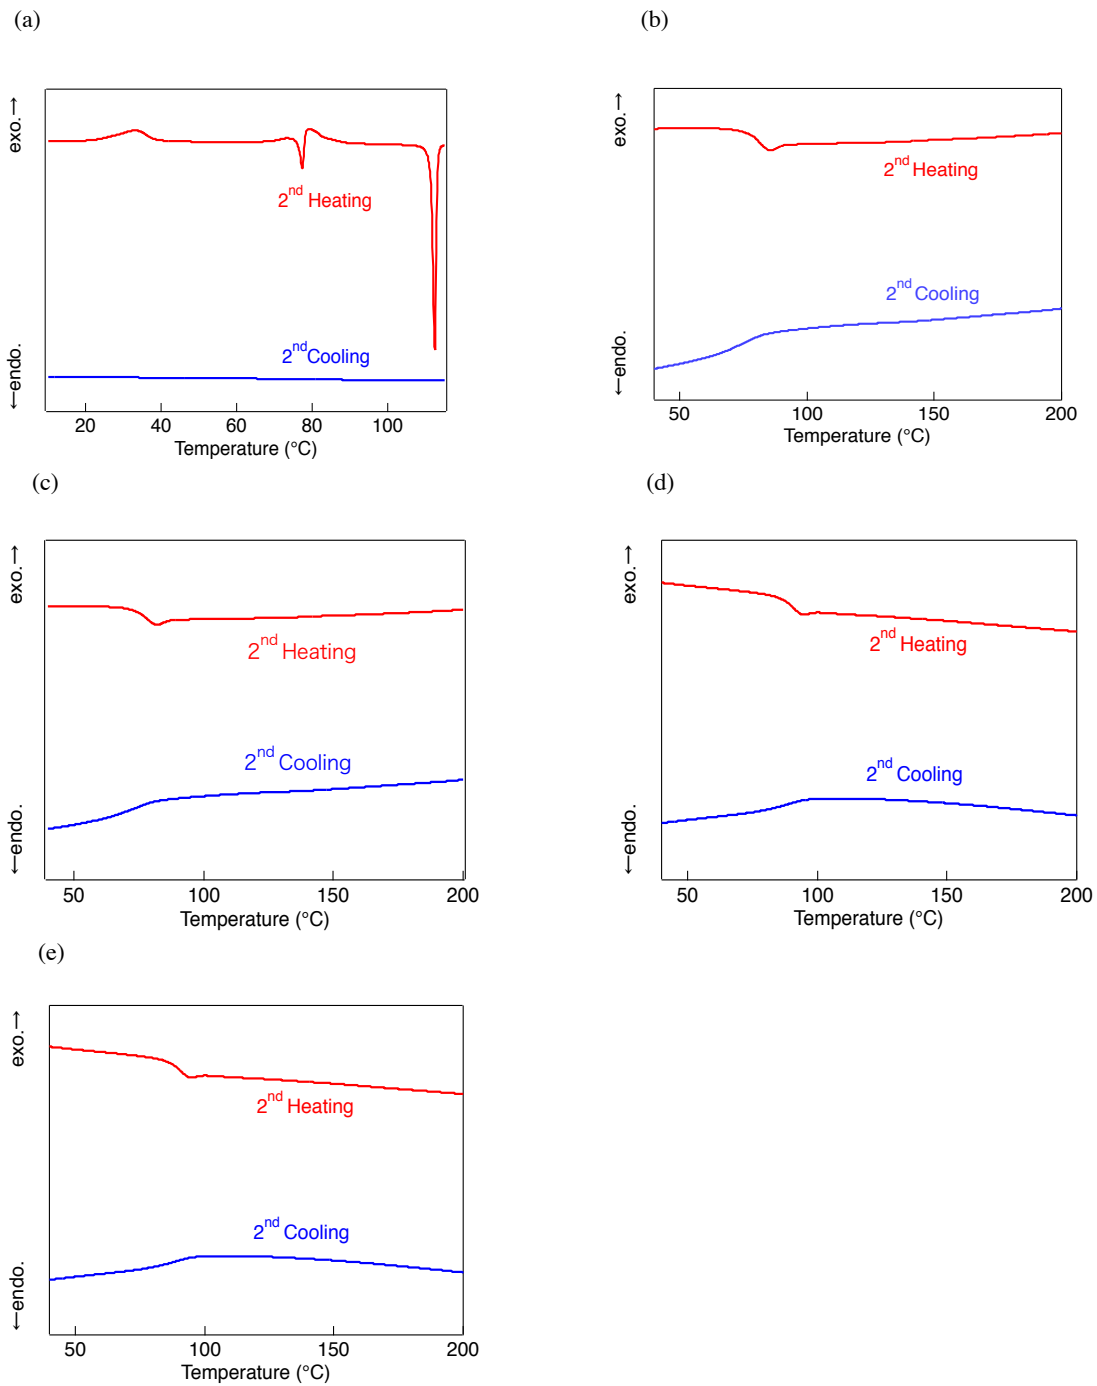

**Figure S2.** DSC analysis for complexes a) **3**; b) **6a-4**; c) **6a-14**; d) **6b-4**; e) **6b-10** in nitrogen atmosphere (Scan rate, 5.0 °C min<sup>-1</sup>).

### 3. $^1\text{H}$ NMR studies

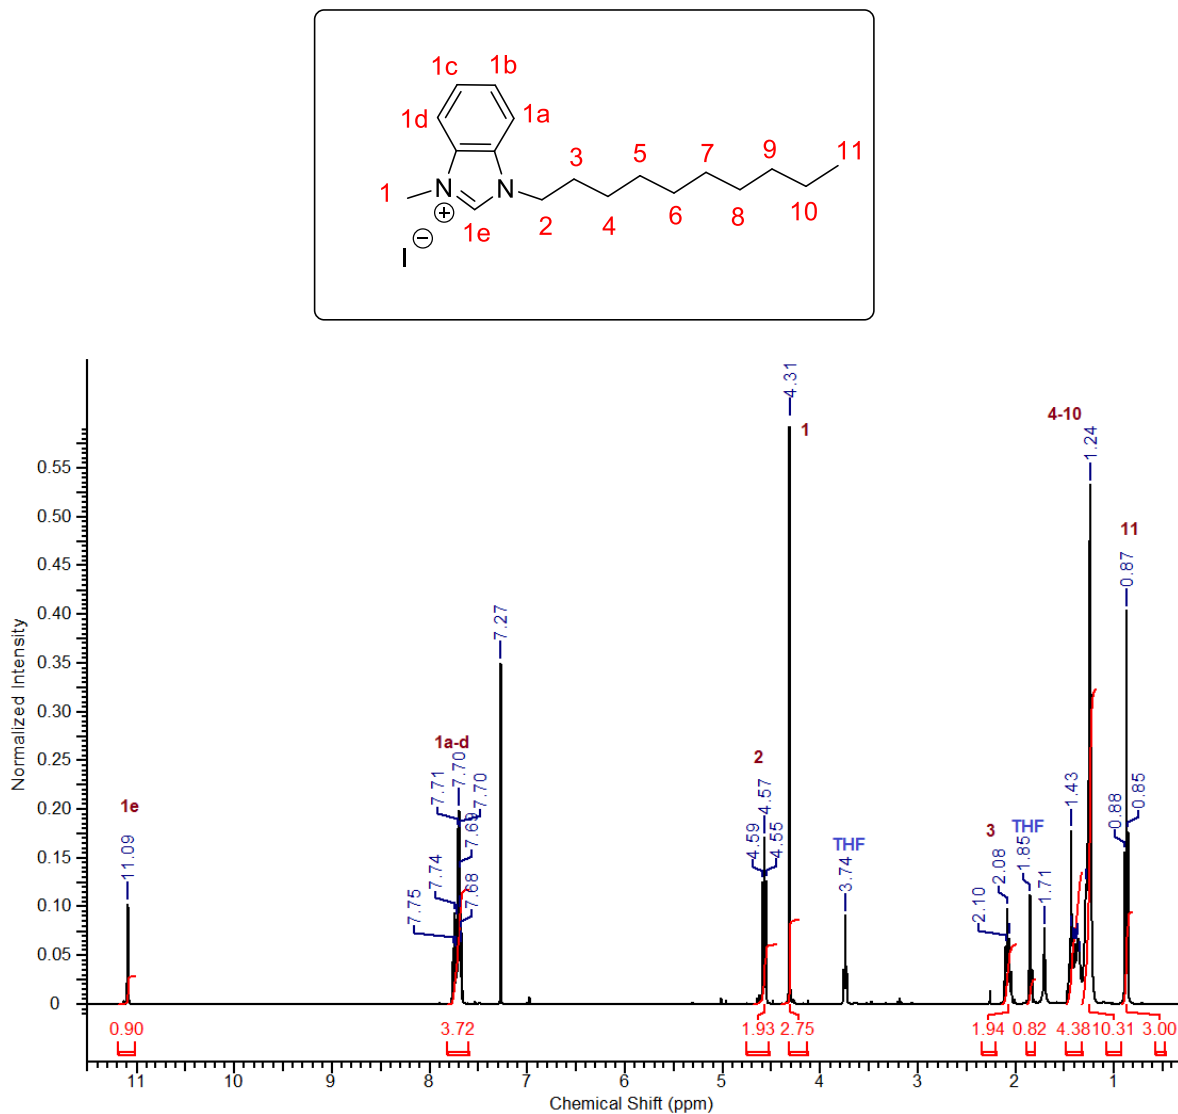

**Figure S3.**  $^1\text{H}$  NMR spectrum (400 MHz,  $\text{CDCl}_3$ , rt) of salt **2**.

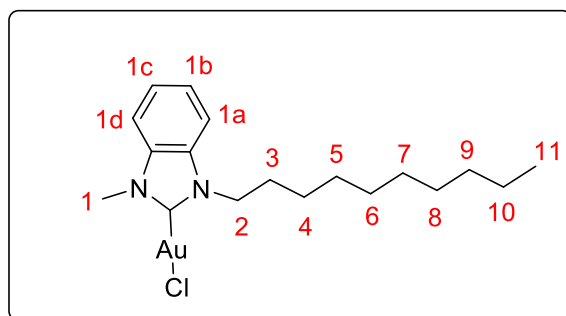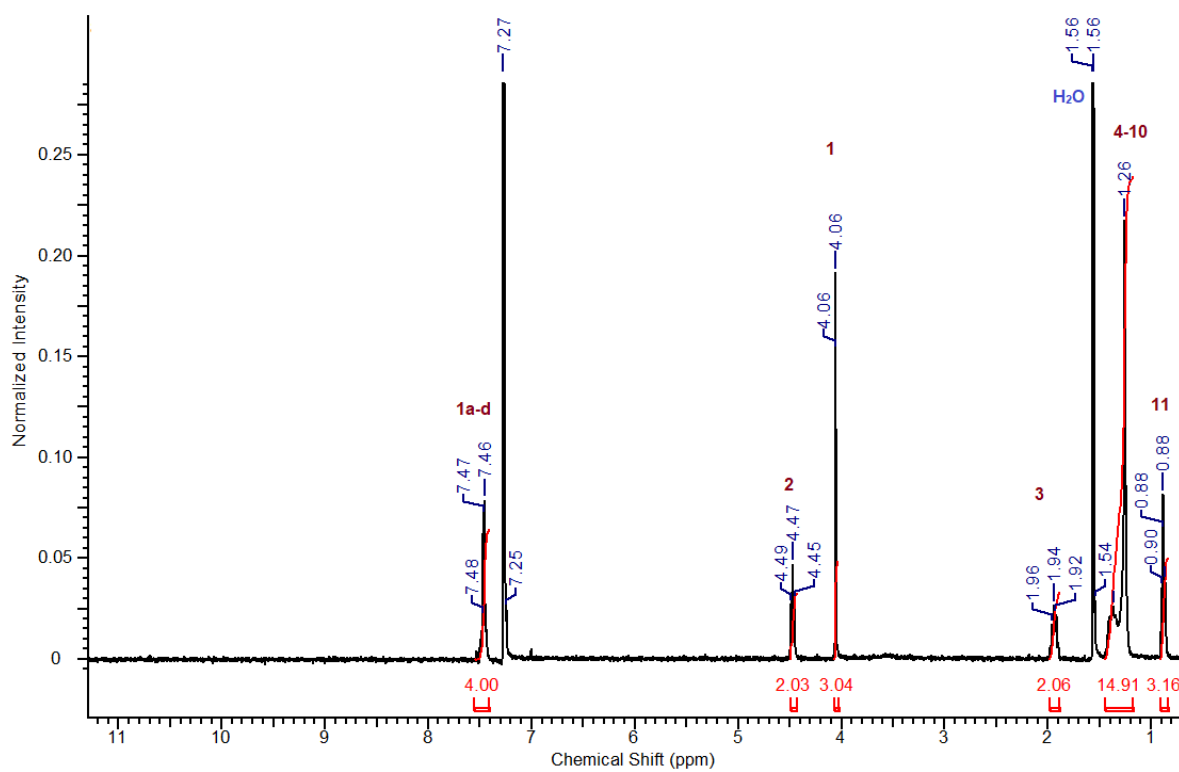

Figure S4. <sup>1</sup>H NMR spectrum (400 MHz, CDCl<sub>3</sub>, rt) of complex **3**.

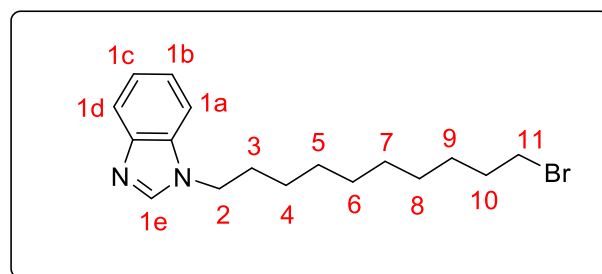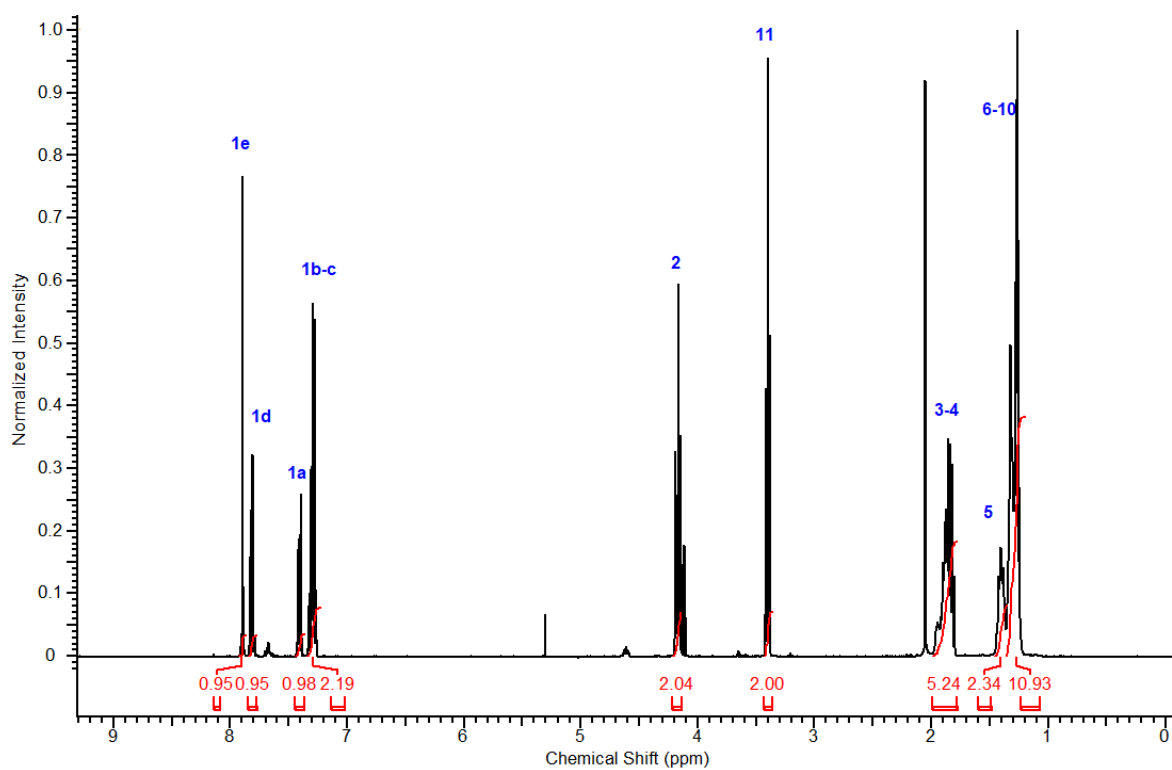

**Figure S5.**  $^1\text{H}$  NMR spectrum (400 MHz,  $\text{CDCl}_3$ , rt) of complex **4a**.

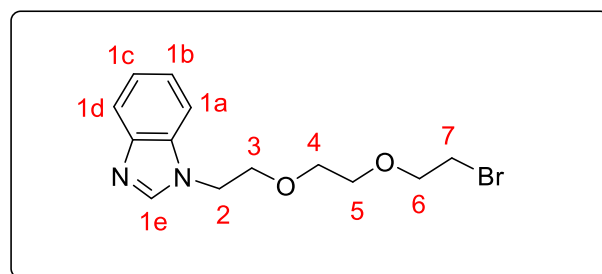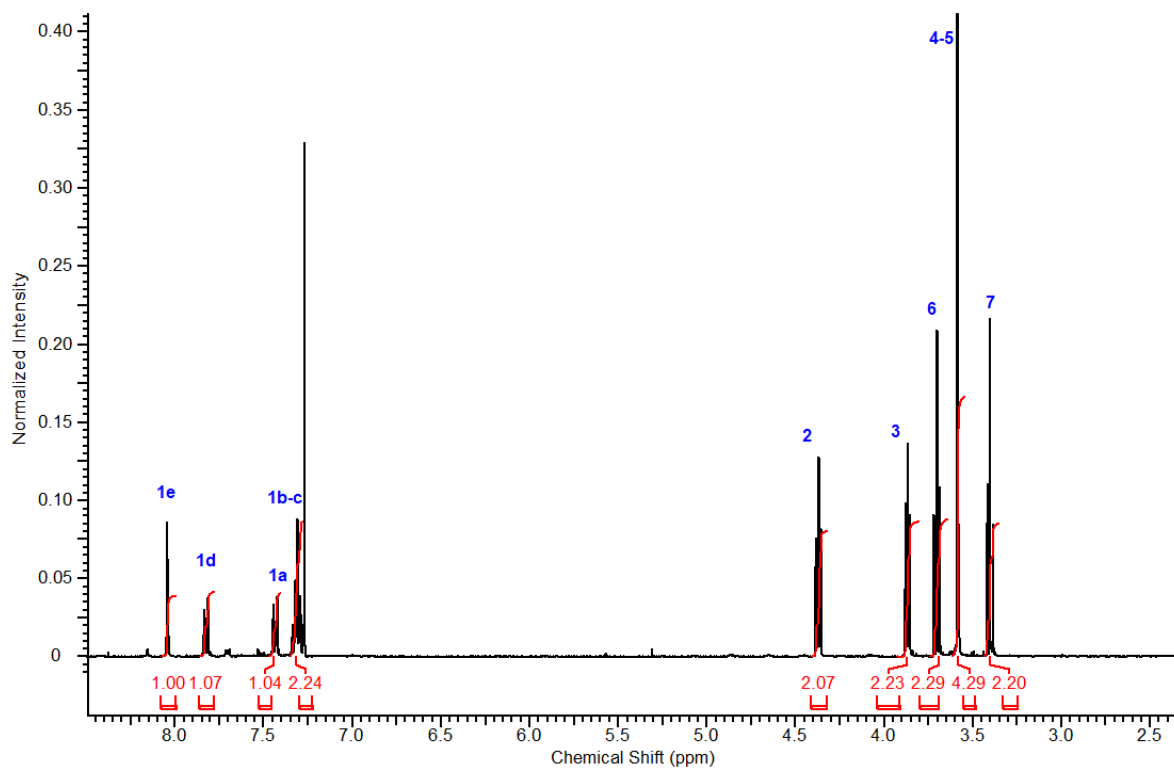

**Figure S6.**  $^1\text{H}$  NMR spectrum (400 MHz,  $\text{CDCl}_3$ , rt) of complex **4b**.

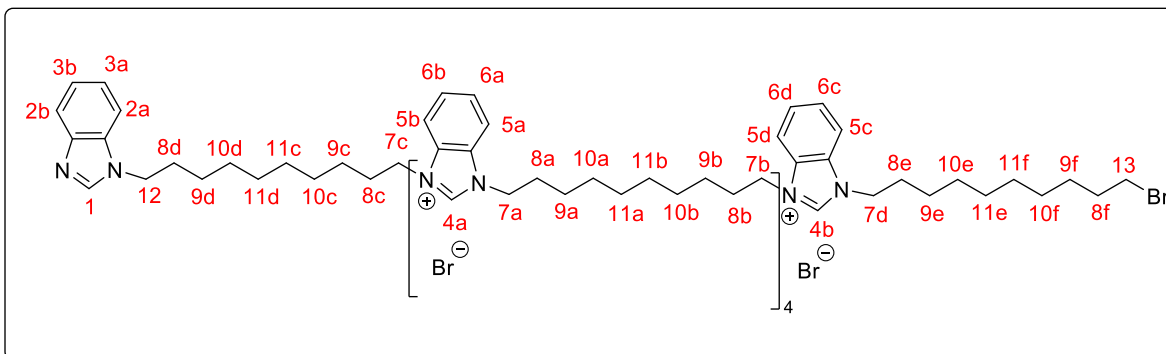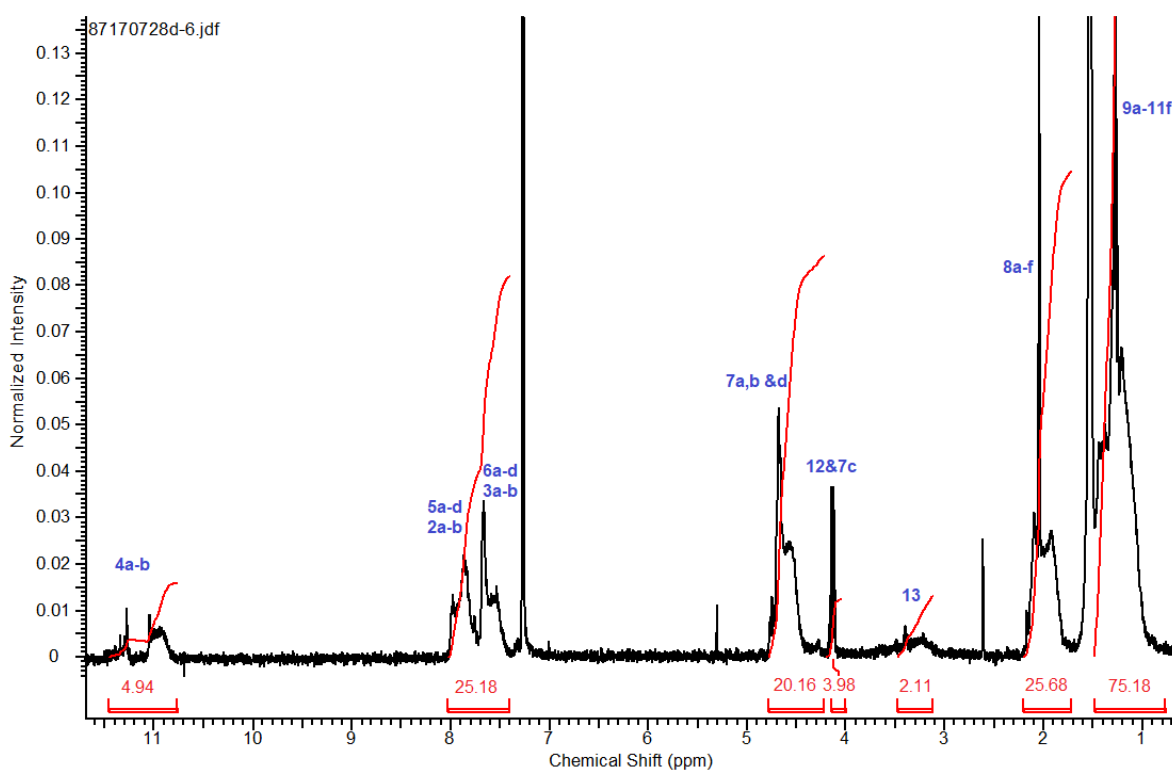

Figure S7.  $^1\text{H}$  NMR spectrum (400 MHz,  $\text{CDCl}_3$ , rt) of complex **5a-4**.



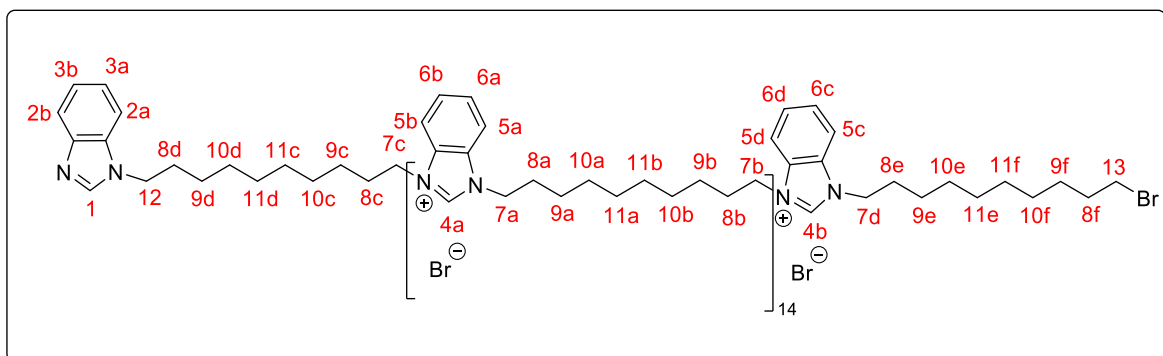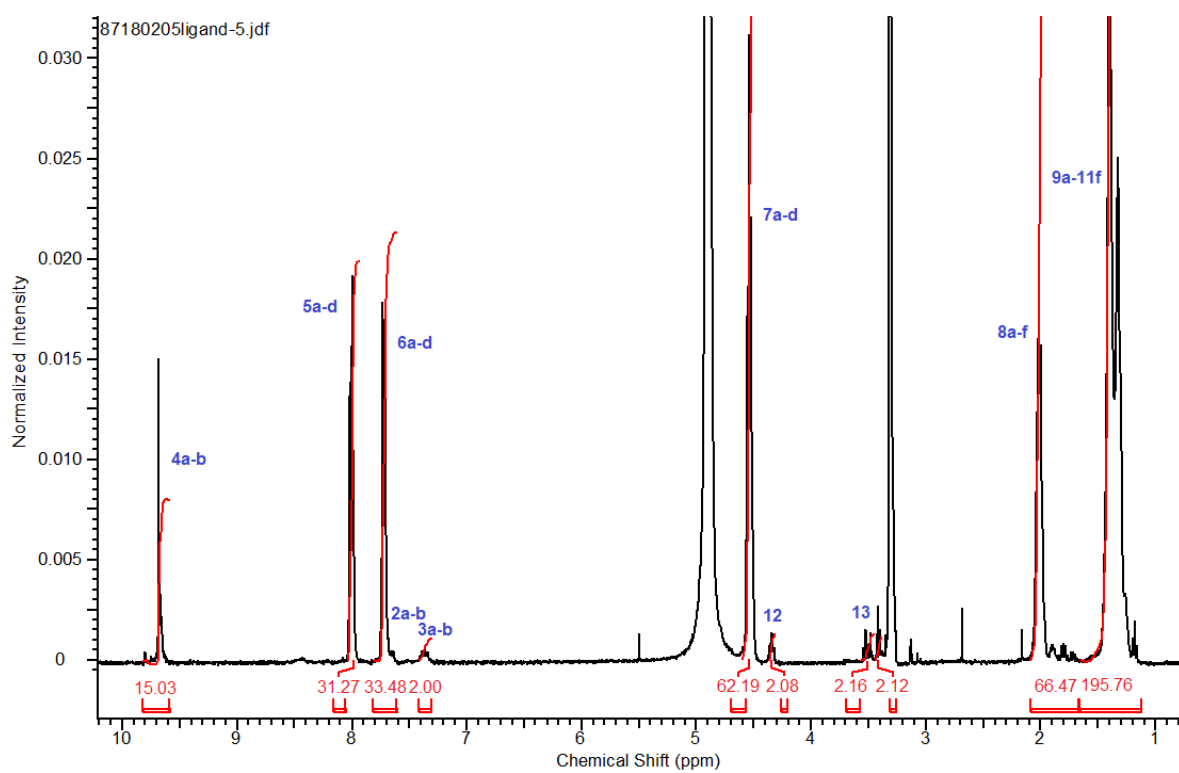

**Figure S8.**  $^1\text{H}$  NMR spectrum (400 MHz, Methanol- $d_4$ , rt) of complex **5a-14**.

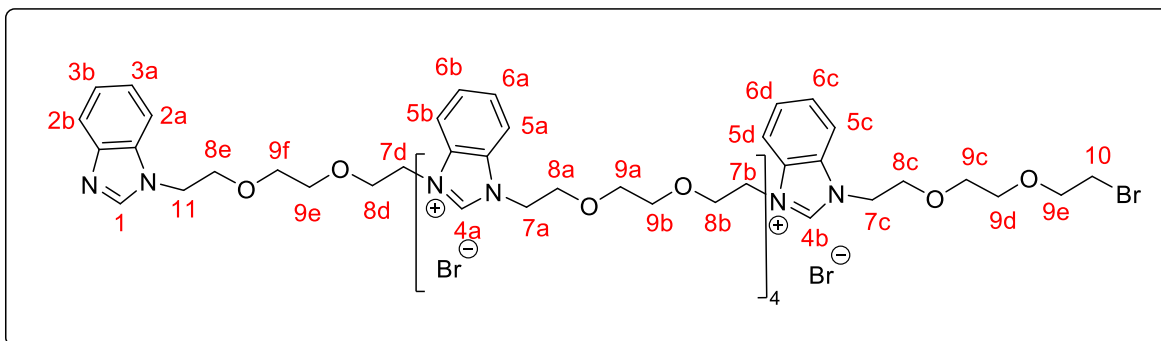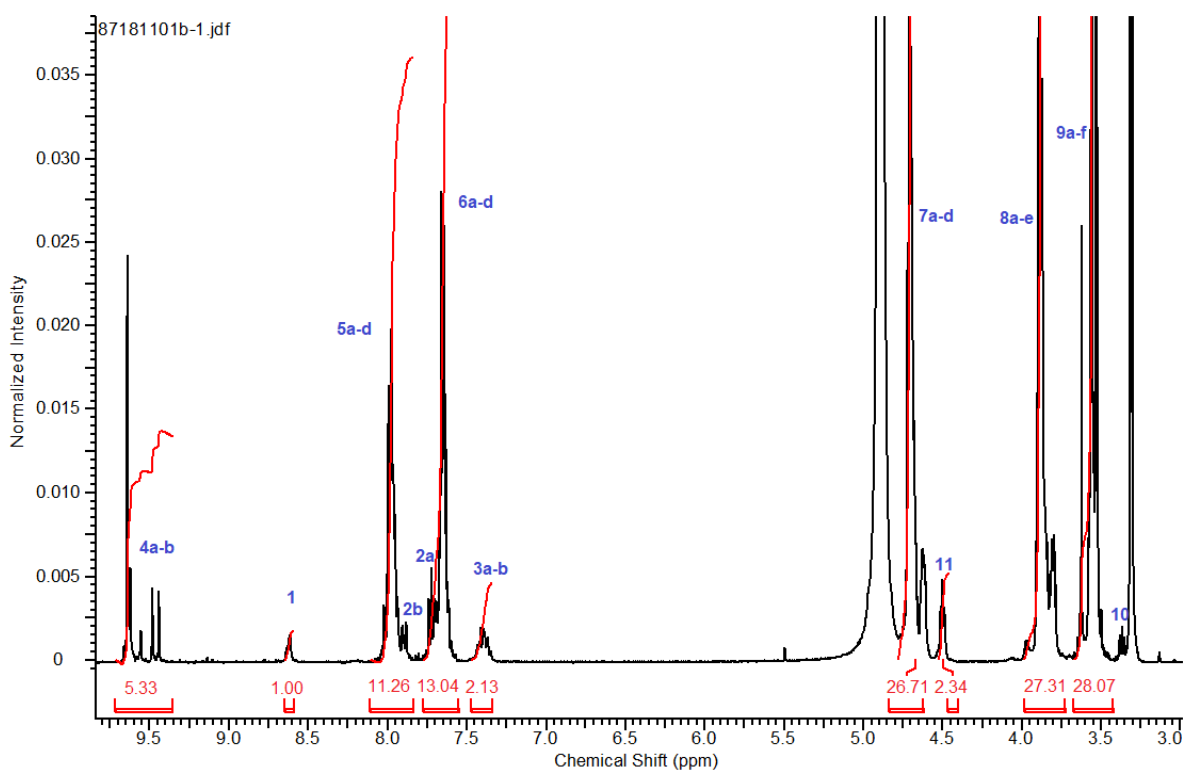

**Figure S9.**  $^1\text{H}$  NMR spectrum (400 MHz, Methanol- $d_4$ , rt) of complex **5b-4**.

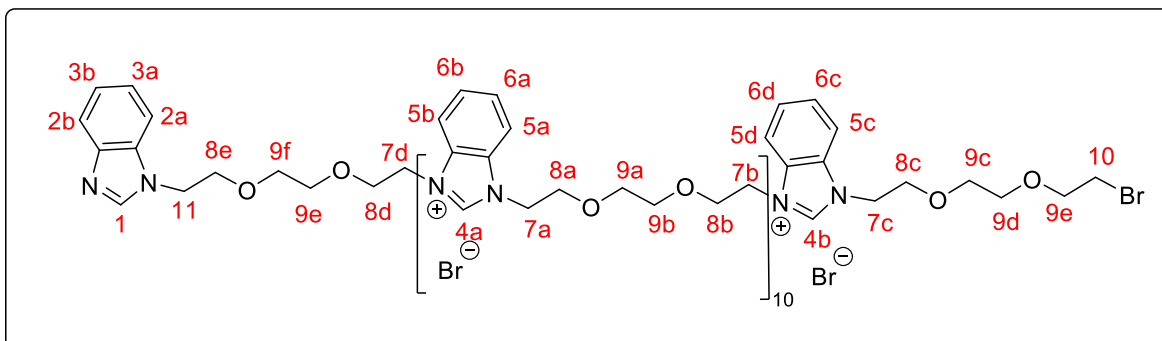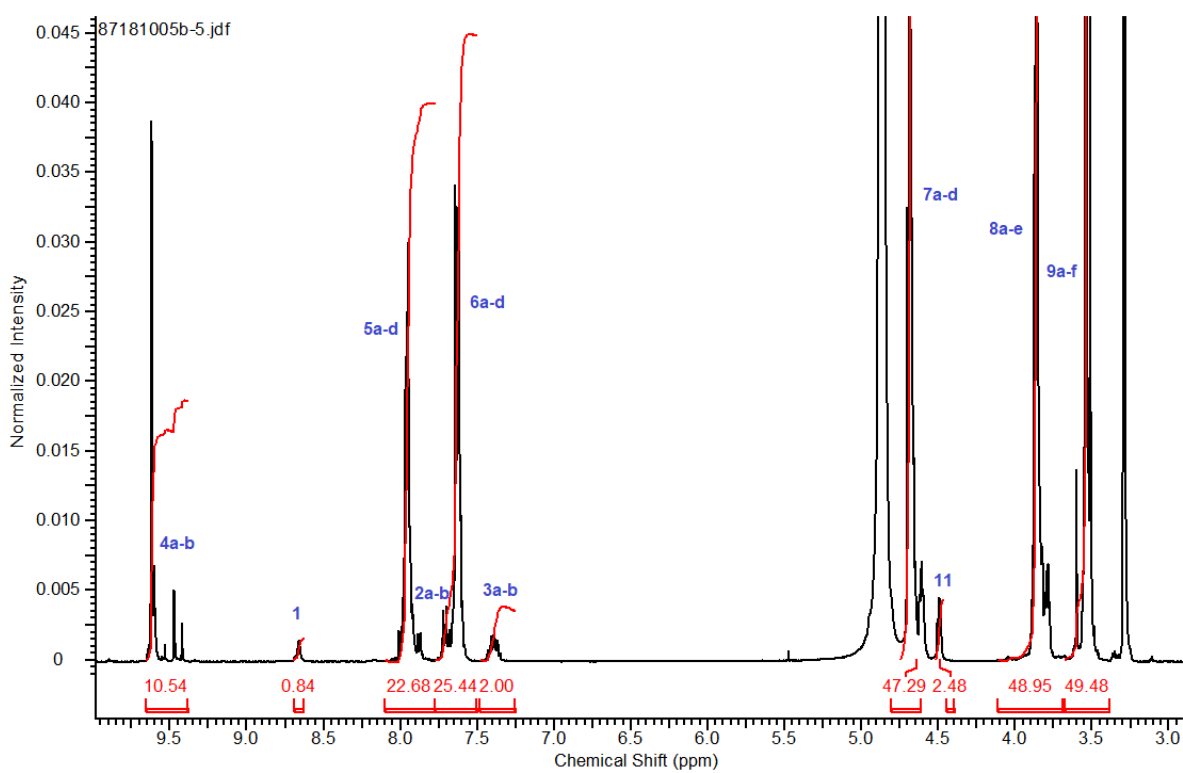

**Figure S10.**  $^1\text{H}$  NMR spectrum (400 MHz, Methanol- $d_4$ , rt) of complex **5b-10**.

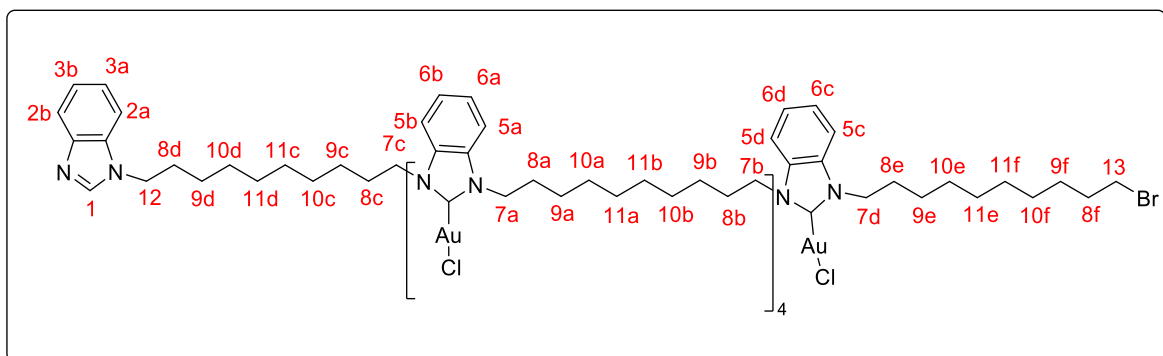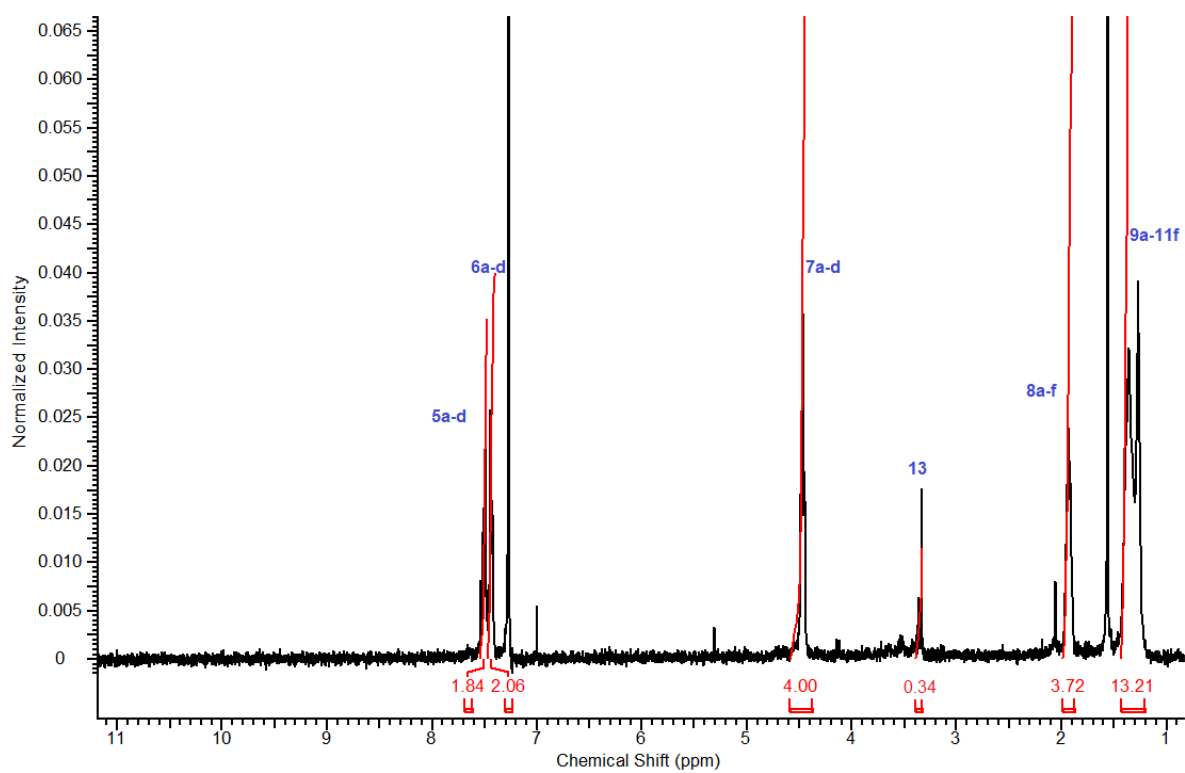

Figure S11.  $^1\text{H}$  NMR spectrum (400 MHz,  $\text{CDCl}_3$ , rt) of complex **6a-4**.

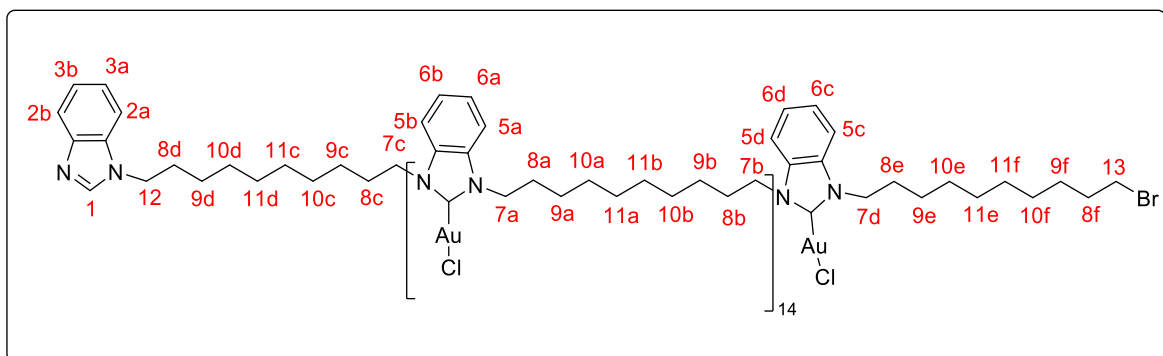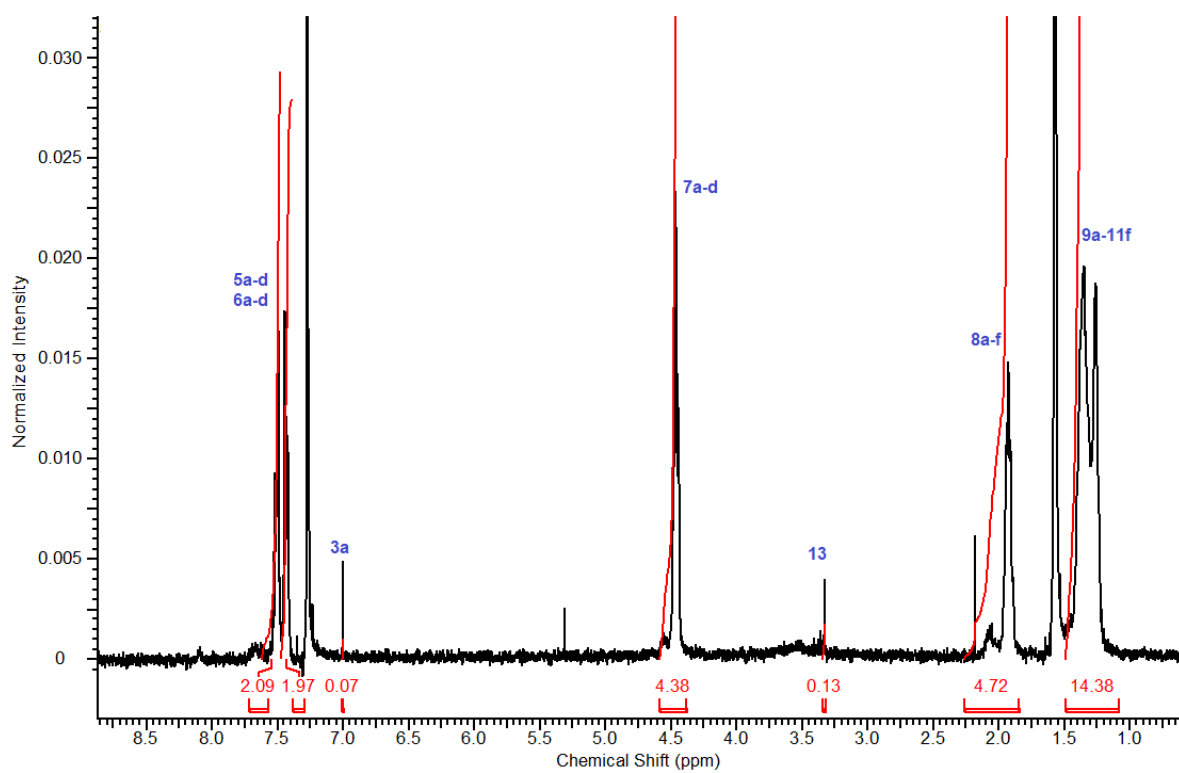

Figure S12.  $^1\text{H}$  NMR spectrum (400 MHz,  $\text{CDCl}_3$ , rt) of complex **6a-14**.



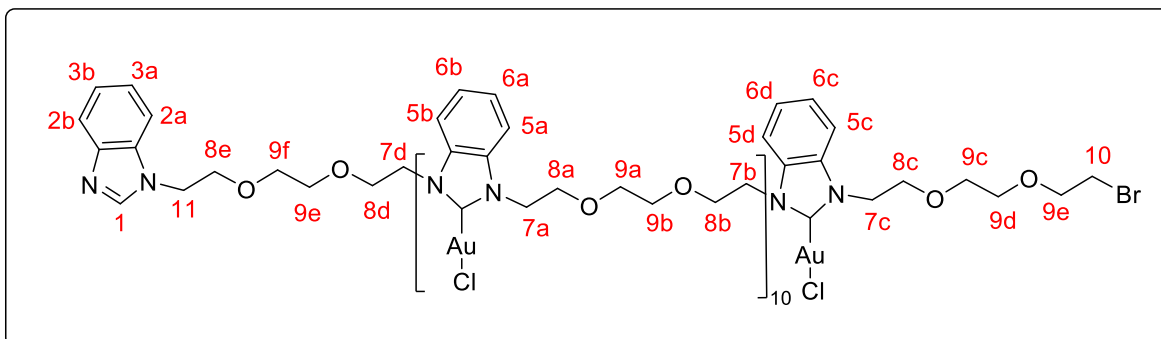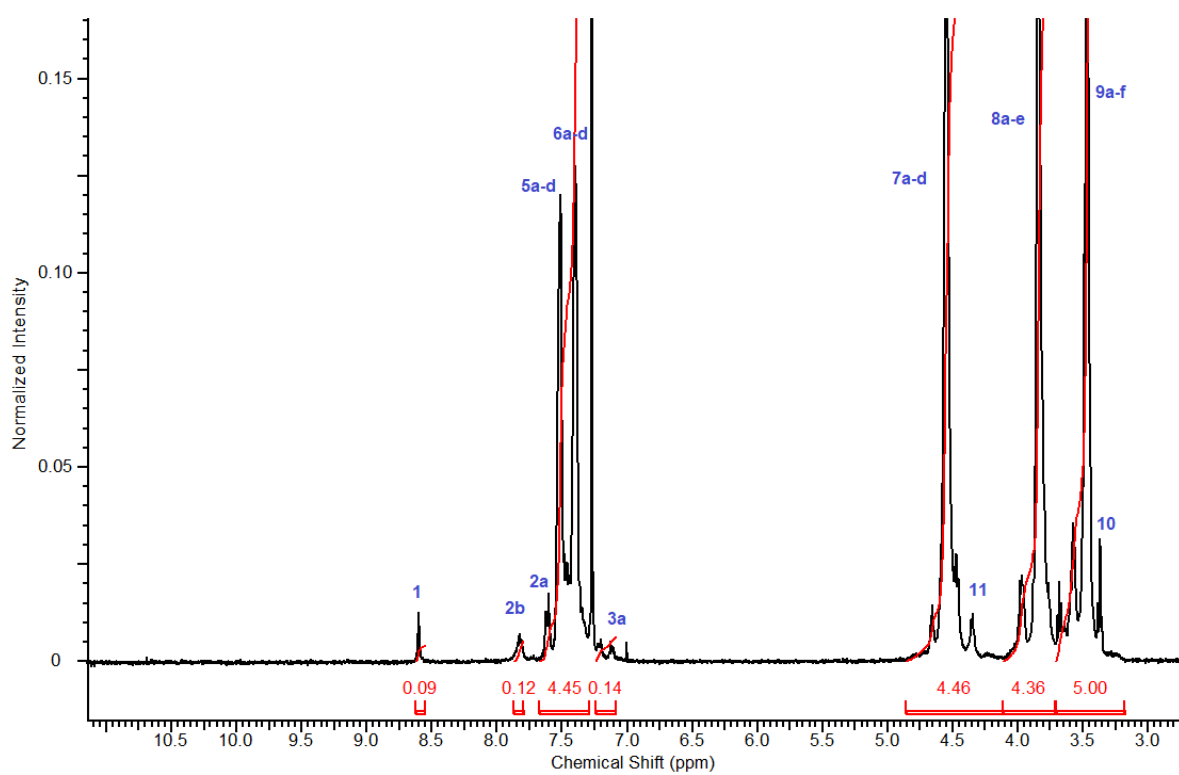

**Figure S14:**  $^1\text{H}$  NMR spectrum (400 MHz,  $\text{CDCl}_3$ , rt) of complex **6b-10**.

#### 4. Solution state photophysical studies (before and after degassing)

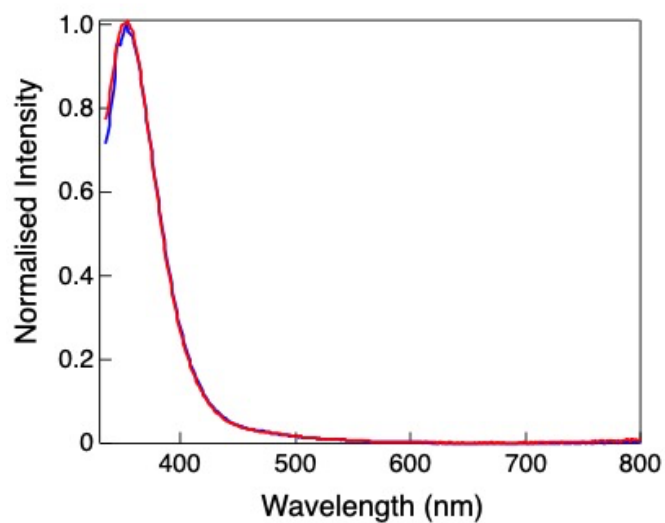

**Figure S15.** Solution state emission study of complex **3** in  $\text{CH}_2\text{Cl}_2$  solution ( $1.7 \times 10^{-6} \text{ mol L}^{-1}$ ) before and after degassing (red, before degassing; blue, after degassing) at  $\lambda_{\text{ex}} = 280 \text{ nm}$ .

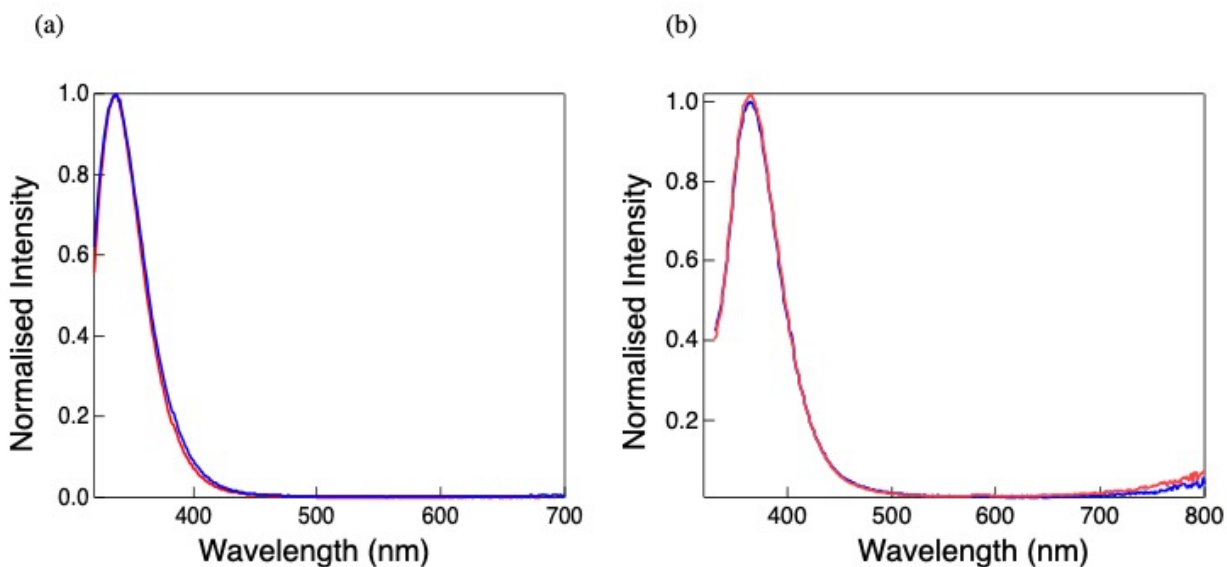

**Figure S16.** Solution state emission study of complexes in  $\text{CH}_2\text{Cl}_2$  solution (a) **6a-4** ( $2.5 \times 10^{-6} \text{ mol L}^{-1}$ ), (b) **6a-14** ( $6.0 \times 10^{-6} \text{ mol L}^{-1}$ ) before and after degassing (red, before degassing; blue, after degassing) at  $\lambda_{\text{ex}} = 280 \text{ nm}$ .



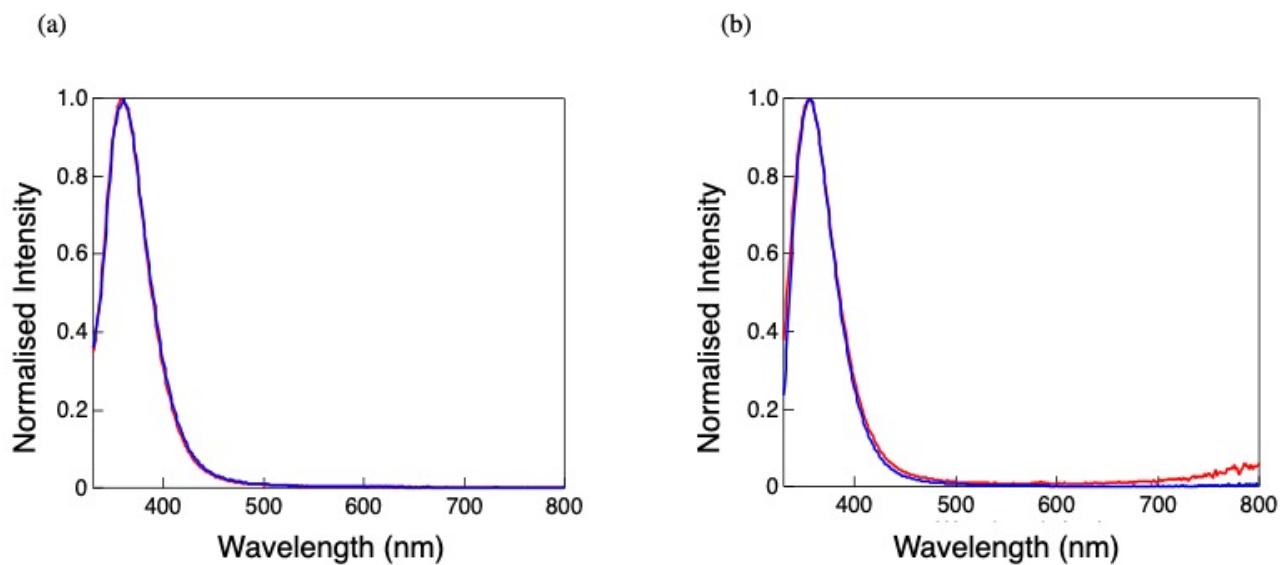

**Figure S17.** Solution state emission study of complexes in CH<sub>2</sub>Cl<sub>2</sub> solution (a) **6b-4** ( $4.3 \times 10^{-6}$  mol L<sup>-1</sup>), (b) **6b-10** ( $8.5 \times 10^{-6}$  mol L<sup>-1</sup>) before and after degassing (red, before degassing; blue, after degassing) at  $\lambda_{\text{ex}} = 280$  nm.

## 5. SCXRD Analysis

(a)

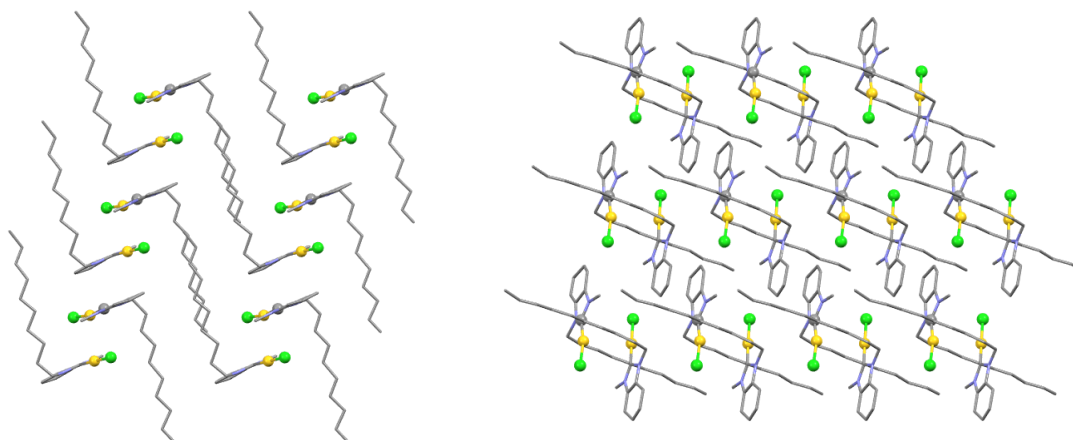

(b)

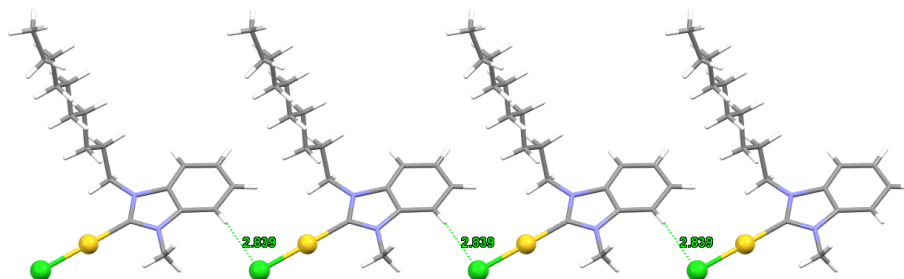

(c)

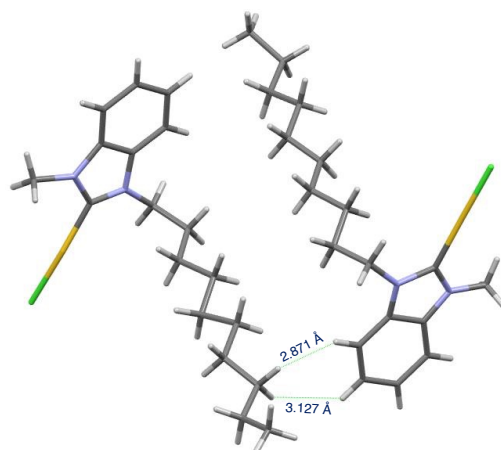

**Figure S18.** (a) Molecular packing of complex **3** with view along b-axis (left) and along c-axis (right); (b) Intermolecular interactions of complex **3** showing intermolecular Cl...H interactions; (c) Intermolecular H-bonding interactions between *N*-methyl moieties and aromatic benzimidazole ring C-H...C BIM group.

**Table S1**, Crystal description of complex **3**

---

|                           |                                                    |
|---------------------------|----------------------------------------------------|
| Empirical formula         | C <sub>18</sub> H <sub>28</sub> AuClN <sub>2</sub> |
| Formula weight            | 504.86                                             |
| Temperature (K)           | 296                                                |
| Colour, Habit             | Colourless, needle                                 |
| Crystal size (mm)         | 0.16 × 0.13 × 0.08                                 |
| Crystal system            | Triclinic                                          |
| $R[F^2 > 2\sigma(F^2)]$   | 0.0409                                             |
| $wR(F^2)$                 | 0.114                                              |
| Space group               | P $\bar{1}$                                        |
| $Z$                       | 3                                                  |
| $a$ (Å)                   | 8.7010 (5)                                         |
| $b$ (Å)                   | 9.2023 (6)                                         |
| $c$ (Å)                   | 13.0929 (5)                                        |
| $\alpha$ (degree)         | 96.876 (5)                                         |
| $\beta$ (degree)          | 105.129 (5)                                        |
| $\gamma$ (degree)         | 100.254 (5)                                        |
| $d$ (g cm <sup>-3</sup> ) | 2.565                                              |
| $V$ (Å <sup>3</sup> )     | 1992.5 (15)                                        |

---

## 6. Phase transition temperature analysis and POM studies

**Table S2.** Phase transition temperature for the complexes **3**, **6a-4**, **6a-14**, **6b-4** and **6b-10**.

| Complex      |                | Phase Transition Temperature (°C) <sup>a</sup>      |
|--------------|----------------|-----------------------------------------------------|
| <b>3</b>     | <b>Heating</b> | Iso 36 Cry <sub>1</sub> 76 Cry <sub>2</sub> 111 Iso |
|              | <b>Cooling</b> | Iso                                                 |
| <b>6a-4</b>  | <b>Heating</b> | Glass 76 Gum                                        |
|              | <b>Cooling</b> | Glass 71 Gum                                        |
| <b>6a-14</b> | <b>Heating</b> | Glass 77 Gum                                        |
|              | <b>Cooling</b> | Glass 78 Gum                                        |
| <b>6b-4</b>  | <b>Heating</b> | Glass 89 Gum                                        |
|              | <b>Cooling</b> | Glass 89 Gum                                        |
| <b>6b-10</b> | <b>Heating</b> | Glass 89 Gum                                        |
|              | <b>Cooling</b> | Glass 89 Gum                                        |

**Abbreviations:** Cry: Crystalline; Iso: Isotropic; Glass: Glass state; Gum: Rubber state.

<sup>a</sup>The thermodynamic parameters were determined using differential scanning calorimetry (DSC) (X-DSC7000, SII) at heating and cooling rates of 5.0 °C min<sup>-1</sup> for complexes **3**, **6a-4**, **6a-14**, **6b-4** and **6b-10**.

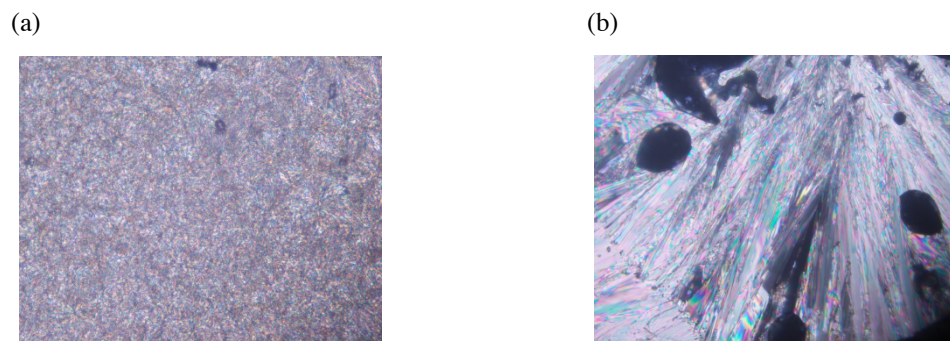

**Figure S19.** Polarising optical micrographs of complex **3** under crossed polarisers: (a) **3** at 45 °C in the 2<sup>nd</sup> heating process (Cry<sub>1</sub> phase); (b) **3** at 85 °C in the 2<sup>nd</sup> heating process (Cry<sub>2</sub> phase). Polarised optical microscopy was carried out using an Olympus BX51 microscope equipped with a temperature-controlled stage (Instec HCS302 microscope hot and cold stage mK1000 temperature controller).

## 7. Solution state photophysical studies of polymeric complexes

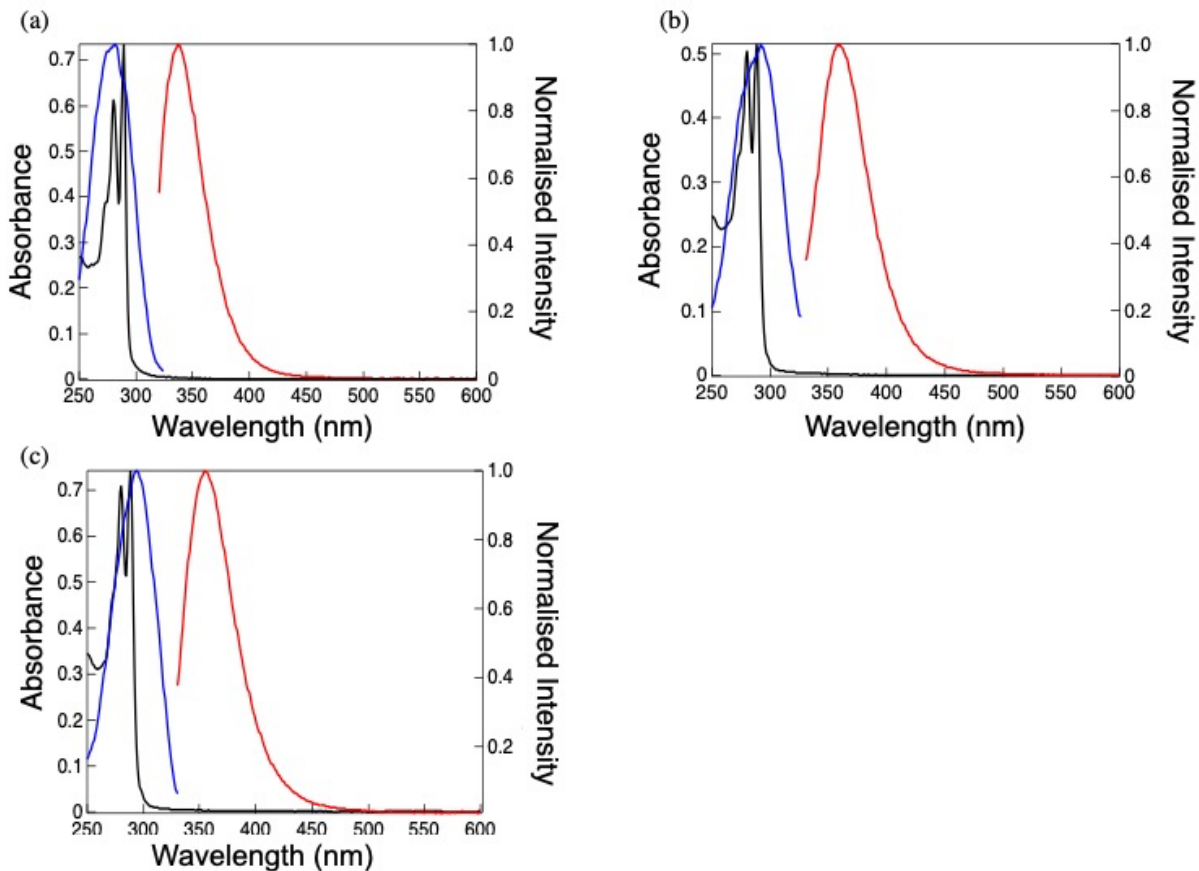

**Figure S20.** Photophysical properties of complexes in dilute CH<sub>2</sub>Cl<sub>2</sub> solution (a) **6a-14** (abs =  $6.0 \times 10^{-5} \text{ mol L}^{-1}$ , emission =  $6.0 \times 10^{-6} \text{ mol L}^{-1}$ ); (b) **6b-4** (abs =  $4.3 \times 10^{-5} \text{ mol L}^{-1}$ , emission =  $4.3 \times 10^{-6} \text{ mol L}^{-1}$ ); (c) **6b-10** (abs =  $8.5 \times 10^{-5} \text{ mol L}^{-1}$ , emission =  $8.5 \times 10^{-6} \text{ mol L}^{-1}$ ). Black, absorption spectra; blue, excitation spectra; red, emission spectra.

## 8. Structure of complex $\text{Me}_2\text{BIAu}(\text{I})\text{Cl}$

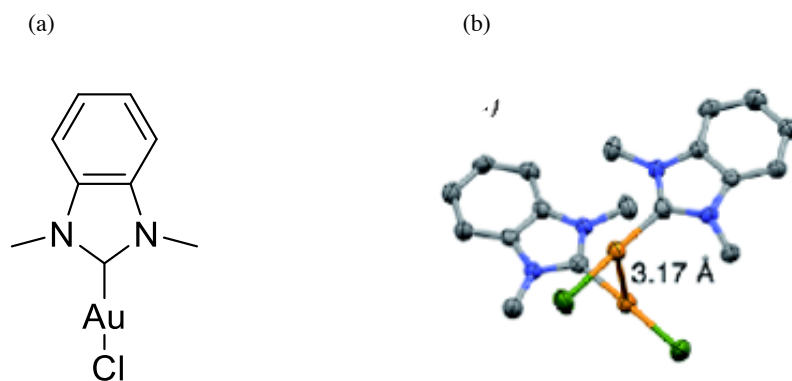

**Figure S21.** (a) Molecular structure of complex  $\text{Me}_2\text{BIAu}(\text{I})\text{Cl}$ . (b) Crystal structure of complex  $\text{Me}_2\text{BIAu}(\text{I})\text{Cl}$ .<sup>1</sup>

## 9. Lifetime decay curves

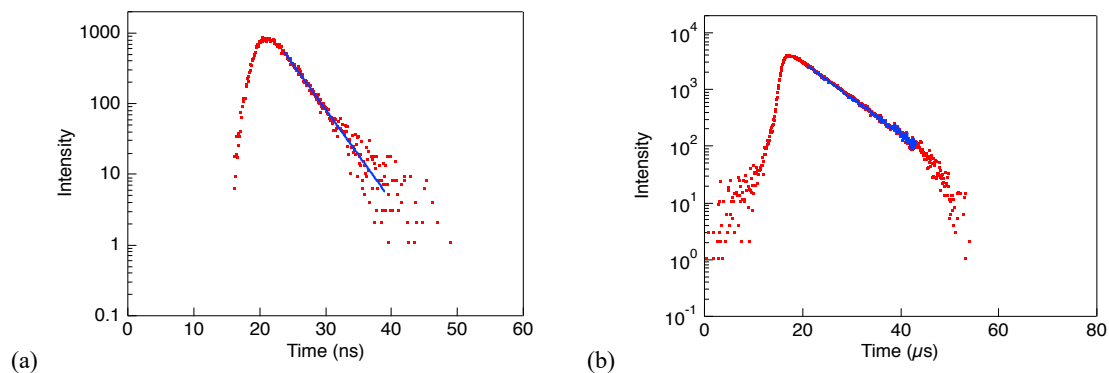

**Figure S22.** Decay profiles (red) and fitting curves (blue) of complex **3** in solid. Measurement wavelength: (a) 380-500 nm, (b) 500-800 nm.

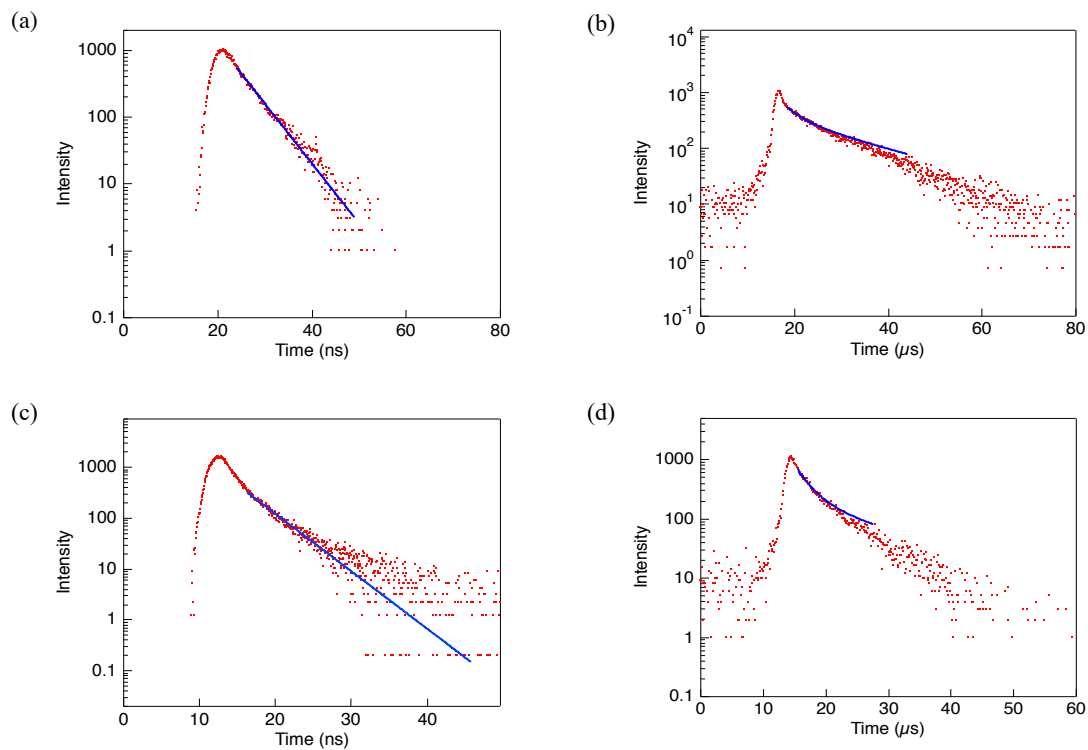

**Figure S23:** Decay profiles (red) and fitting curves (blue) of complexes in solid: (a, b) **6a-4**, (c, d) **6a-14**. Measurement wavelength: (a) 380-560 nm, (b) 560-800 nm, (c) 400-500 nm, (d) 600-800 nm.

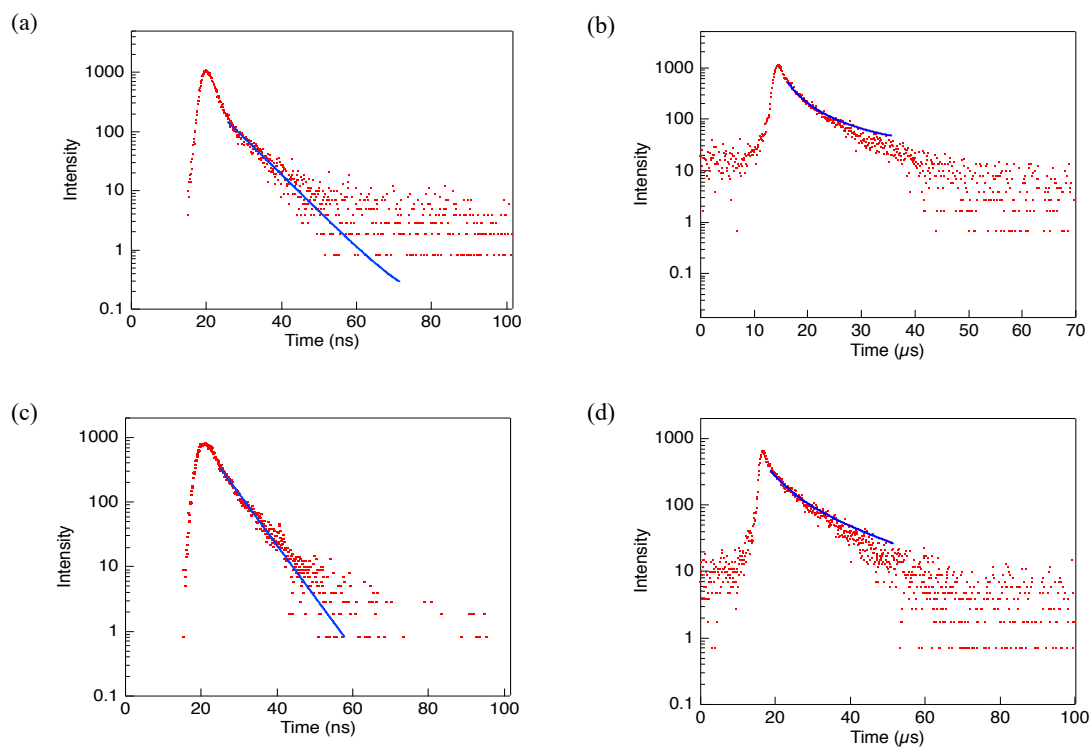

**Figure S24.** Decay profiles (red) and fitting curves (blue) of complexes in solid: (a, b) **6b-4**, (c, d) **6b-14**. Measurement wavelength: (a) 400-500 nm, (b) 600-800 nm, (c) 400-500 nm, (d) 600-800 nm.

## 10. PXRD Analysis

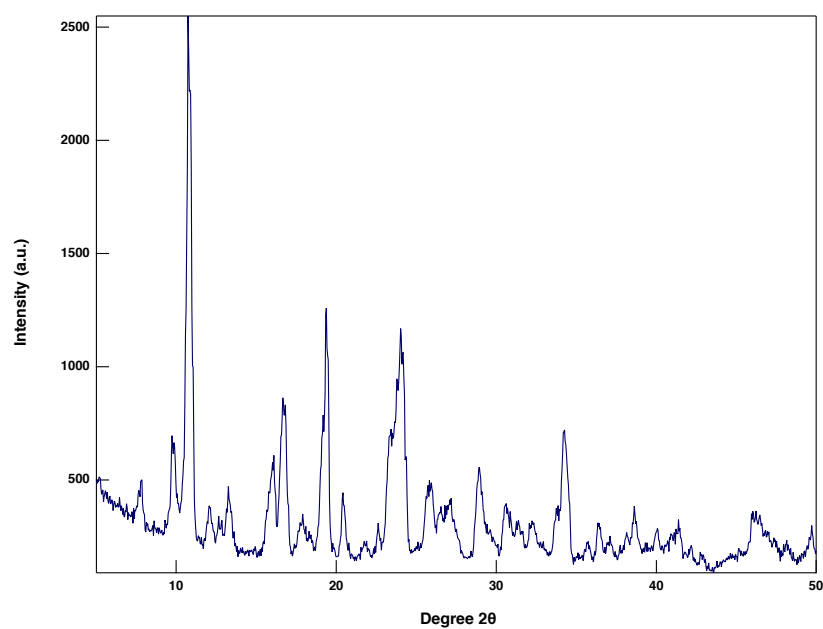

**Figure S25.** PXRD analysis of complex **3** at rt.



## 11. CIE Plot

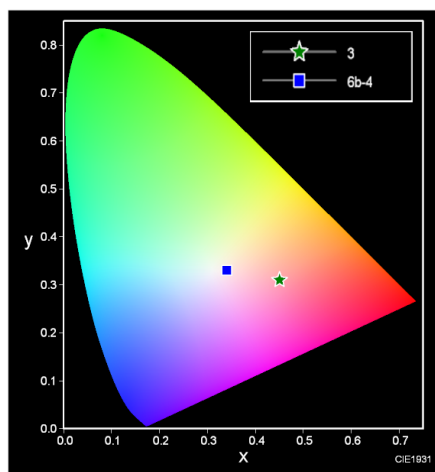

**Figure S26.** CIE plot of complex **3** with CIE coordinates of  $(x, y) = (0.45, 0.31)$  and **6b-4** with  $(0.34, 0.33)$  in solid state.

## 12. References

1. A. Sathyanarayana, S.-Y. Nakamura, K. Hisano, O. Tsutsumi, K. Srinivas and G. Prabusankar, *Sci. China Chem.*, 2018, **61**, 957
